## Relic DNA contributes minimally to estimates of microbial diversity

2

JT Lennon<sup>1\*</sup>, SA Placella<sup>2</sup>, ME Muscarella<sup>1,3</sup>

4

<sup>1</sup>Indiana University, Department of Biology

6

<sup>2</sup>Michigan State University, W.K. Kellogg Biological Station

<sup>3</sup>University of Illinois, Department of Plant Biology

8

\* corresponding author: [lennonj@indiana.edu](mailto:lennonj@indiana.edu)

10

Extracellular or "relic" DNA is one of the largest pools of nucleic acids in the biosphere<sup>1,2</sup>. Relic DNA can influence a number of important ecological and evolutionary processes, but it may also bias estimates of microbial abundance and diversity, which has implications for understanding environmental, engineered, and host-associated ecosystems. We developed theoretical predictions from a simulation model based on sampling a species abundance distribution to assess how and when relic DNA biases estimates of microbial diversity. We then tested our predictions by quantifying relic DNA and assessing its contribution to bacterial diversity using 16S rRNA gene sequences collected from soil, sediment, water, and mammalian gut environments. On average, relic DNA made up 33 % of the total bacterial DNA pool, but exceeded 80 % in some samples. Despite its abundance, relic DNA had a minimal effect on estimates of taxonomic and phylogenetic diversity, which is consistent with model simulations where the processes regulating the compositional turnover of relic and intact DNA are at steady state. When such conditions are met, relic DNA should not bias cultivation-independent estimates of microbial diversity.

When microorganisms die, their DNA leaks into the surrounding environment. The fate of this relic DNA has important implications for evolutionary and ecological processes. For example, relic DNA can be taken up and incorporated into the genomes of some microorganisms via transformation, thereby serving as a reservoir of genetic information that can confer new traits and fitness benefits to distantly related taxa<sup>3</sup>. In addition, relic DNA is a high-quality resource containing carbon, nitrogen, and phosphorus that is consumed by a diverse array of bacteria with consequences for microbial community structure and ecosystem processes<sup>1,4</sup>.

Relic DNA also has the potential to bias cultivation-independent estimates of diversity, which are widely used for addressing questions concerning the assembly, biogeography, and functioning of microbial communities. Microbial DNA extracted from environmental and host-associated samples is not solely derived from metabolically active organisms<sup>5</sup>. A large portion of the individuals in a microbial community is dormant or dead<sup>6,7</sup>. Although nucleic acids can be temporarily retained in non-viable cells, DNA is ultimately released into the environment when individuals die from autolysis, senescence, viral infection, or predation<sup>8</sup>. Together, these sources of mortality can create large pools of relic DNA<sup>2,9</sup>. For example, there is an estimated 0.45 petagrams of relic DNA in global ocean sediments, which is 70-fold greater than the amount of DNA contained in intact cells from the same environments<sup>1</sup>. If included in cultivation-independent approaches, relic DNA could distort our understanding of the ecological and evolutionary processes that regulate the distribution, abundance, and function of microbial taxa.

The accumulation and turnover of relic DNA varies among ecosystems in ways that may bias estimates of microbial diversity. In some environments, DNA is rapidly broken down outside the cell via hydrolysis, oxidation, and UV-mediated damage<sup>2</sup>. These degradation processes are reflected by the size distribution of relic DNA, which tends to be skewed towards small fragments ranging between 100 and 500 base pairs<sup>10,11</sup>. In addition, the residence time of relic DNA is extremely short in some ecosystems. In freshwater and marine habitats, extracellular DNA turns over in less than one day<sup>12,13</sup> while plasmid DNA begins to degrade in just minutes<sup>14</sup>. In other environments, the degradation of relic DNA can be much slower. For example, DNA can bind with inorganic and organic substances in soils and sediments depending on cation availability and pH<sup>9</sup>. The resulting adsorption can increase the persistence of relic DNA by protecting it from hydrolytic enzymes<sup>15,16</sup>. In addition, relic DNA is contained in

biofilms<sup>8</sup>, and appears to be enriched in the gut mucosa of hosts with high-fat diets<sup>17</sup>. As a  
 58 result, even in systems with high DNase activity, large pools of relic DNA can accumulate<sup>18</sup>.

To date, the documented effects of relic DNA on estimates of diversity are idiosyncratic.  
 60 Even in samples with relatively large relic DNA pools, bias can be non-existent or substantial,  
 and lead to the overestimation or underestimation of diversity<sup>19,20</sup>. To delve further into this  
 62 apparent unpredictability, we developed a theoretical framework to explore how relic DNA  
 affects estimates of microbial diversity. While some variability in the effect of relic DNA may  
 64 reflect taxonomic- or ecosystems-specific features, we hypothesized that the magnitude and  
 direction of bias can be explained by the richness and evenness of sequences contained in the  
 66 relic DNA pool. We used a simulation model to identify conditions where sampling effects lead  
 to biased estimates of microbial diversity based on the size and species abundance distribution  
 68 (SAD) of the relic DNA pool. We then tested our model predictions by quantifying the  
 contribution of relic DNA on the abundance and diversity of bacterial communities in four  
 70 distinct ecosystem types, including soils, sediments, surface waters, and mammalian guts.

## 72 RESULTS

We developed a model that represents the dynamics of relic DNA. The size of the relic  
 74 DNA pool is affected by inputs associated with the death rates of microorganisms and by losses  
 associated with the degradation of relic DNA. When death rates exceed degradation rates, the  
 76 size of the relic DNA pool increases (Fig. 1a). However, a large relic DNA pool is not sufficient  
 to create bias in diversity estimation. Rather, the direction and magnitude of bias reflects the  
 78 simultaneous sampling of taxa from the species abundance distributions (SAD) associated with  
 the relic and intact pools. Using sampling-based simulations (see Methods), we found that there

was no bias in estimating the number of microbial taxa (richness) when the SAD of the intact community was similar to the SAD of the relic pool (Fig. 1b-c). Such conditions are satisfied when the death rates and degradation rates are proportional among taxa. Owing to sampling effects, our simulations reveal that bias can arise when the SADs of the relic and intact pools are different. For example, our simulations predict that richness is overestimated when diversity (richness or evenness) is elevated in the relic pool, which reflects the increased probability of sampling many unique taxa (Fig. 1b-c). Alternatively, richness can be underestimated when the diversity (richness or evenness) of the relic DNA pool is lower than the diversity of sequences in the intact pool (Fig. 1b-c), which reflects an increased probability of sampling a few disproportionately abundant (i.e., dominant) taxa. Such conditions should arise when processes (death and degradation) influencing the turnover of relic DNA are decoupled for different taxa in the intact and relic pools (Fig. 1a). The conditions leading to the over- or under-estimation of richness also translate into biased measurements of beta-diversity (between-samples) due to compositional changes in the relative abundances of sequences (Fig. S1). Thus, we predict that properties of the species abundance distribution – in particular, richness and evenness – determine whether or not relic DNA biases estimates of microbial diversity.

**Variation in relic DNA pool size** — We evaluated our model predictions by collecting samples from different ecosystem types (soil, sediment, water, and mammalian guts) that are hypothesized to vary in relic DNA turnover rates<sup>10,16</sup>. Using quantitative PCR with 16S rRNA primers, we quantified intact DNA after treating an aliquot of sample with DNase to remove relic DNA. In addition, we quantified total DNA (intact + relic) from a control aliquot of sample that was not treated with DNase (see Methods and Fig. S2). Relic DNA accounted for a substantial

but variable portion of the total bacterial DNA. The proportion of relic DNA was normally distributed (mean  $\pm$  sd =  $0.33 \pm 0.218$ ) and ranged from 0 to 0.83 across 34 samples obtained from different ecosystem types (Fig. 2). These results are in line with the amount of relic DNA that has been reported in other studies<sup>19,20,24</sup>. Even though host and environmental features associated with these habitats are thought to influence relic DNA dynamics, there was only a marginally significant effect of ecosystem type on the proportion of relic DNA (one-way ANOVA,  $F_{3,30} = 2.43$ ,  $P = 0.08$ )<sup>2,19</sup>. Nevertheless, the large average pool size and range in relic DNA provided us with the opportunity to test our model predictions regarding the magnitude and direction of bias that relic DNA should have on estimates of microbial diversity.

**Magnitude and direction of bias on microbial diversity** — We sequenced 16S rRNA genes from the intact and total DNA pools to determine whether and to what degree relic DNA biased the taxonomic and phylogenetic alpha-diversity of bacterial communities. Despite accounting for a substantial portion of the total DNA (Fig. 2), relic DNA had no effect on estimates of richness, evenness, or phylogenetic diversity (PD) (Table S1). We expressed each of these alpha-diversity metrics as a ratio (total / intact), where values  $> 1$  represent overestimation bias and values  $< 1$  represent underestimation bias. Relic DNA had no effect on the diversity ratios based on the observation that the 95 % confidence intervals overlapped with 1.0 (Fig. 3). Furthermore, the 95 % confidence intervals of the diversity ratios overlapped across ecosystem types, indicating that the contribution of relic DNA to all measures of diversity was low irrespective of the microbial habitat sampled. Finally, using simple linear regression, we tested our model predictions that the magnitude of bias has the potential to increase with increasing relic DNA pool size (see Fig. 1b-c). For all diversity ratios (richness, evenness, and PD), the slopes were not different from zero

( $P > 0.65$ ) and the intercepts were not different from 1.0 ( $P > 0.18$ ) (Fig. S3). These findings are consistent with simulations predicting that in order for bias to arise, there must be differences in the diversity of the intact and relic DNA pools (Fig. 1b-c).

**Contribution of relic DNA to community composition** — We estimated the effects of relic DNA on the compositional diversity for the intact and total DNA pools. Principal Coordinates Analysis (PCoA) revealed that bacterial composition was strongly affected by ecosystem type (Fig. S4), which was supported by permutational multivariate analysis of variance (PERMANOVA) using both taxonomic ( $R^2 = 0.35$ ,  $F_{3,50} = 9.33$ ,  $P = 0.001$ ) and phylogenetic ( $R^2 = 0.65$ ,  $F_{3,50} = 31.8$ ,  $P = 0.001$ ) distance matrices. However, multiple lines of evidence suggest that relic DNA had no appreciable effect on the observed bacterial composition. First, the intact and total DNA pools were significantly and highly correlated with one another when we performed a Mantel test using Bray-Curtis distances, which reflect taxonomic dissimilarity ( $P = 0.001$ ,  $r = 0.959$ ), and UniFrac distances, which capture phylogenetic dissimilarity ( $P = 0.001$ ,  $r = 0.996$ ). Second, we tested for the effect of relic DNA on beta-diversity by calculating centroid distance ratios (see Methods). If the centroid distance ratio was  $> 1$ , we concluded that relic DNA inflated beta-diversity; if the distance ratio was  $< 1$ , we concluded that relic DNA homogenized beta-diversity. Relic DNA had no effect on the centroid distance ratios based on the observation that the 95 % confidence intervals overlapped with 1.0 (Fig. 4). Furthermore, the 95 % confidence intervals for the centroid distance ratios overlapped across ecosystem types, indicating that the contribution of relic DNA to beta-diversity was unaffected by different taxa or environmental conditions in the distinct microbial habitats. Last, we used simple linear regression to test our model predictions that bias in estimates of community composition would

increase with increasing relic DNA pool size (see Fig. S1). The proportion of relic DNA in a sample had no effect on the slopes for centroid distance ratios regardless of whether they were calculated using taxonomic ( $P = 0.48$ ) or phylogenetic ( $P = 0.75$ ) distance matrices. Similarly, the intercepts for these regression relationships were not significantly different from 1 ( $P > 0.3$ ) (Fig. S5). These empirical findings are consistent with simulations predicting that in order for bias to arise, there must be differences in the diversity between the intact and relic DNA pools (Fig. S1).

## DISCUSSION

Rarely, if ever, are biological communities completely censused. As a result, estimates of diversity are often based on incomplete sampling, which introduces uncertainty and potential bias. For microbiologists using cultivation-independent approaches, diversity estimation is further complicated by the accumulation and persistence of relic DNA, which may have an abundance distribution that is distinct from that of the sequences contained in viable cells. In such cases, our simulation models predict that microbial diversity can be overestimated or underestimated depending on the size, richness, and evenness of the relic DNA pool (Fig. 1b-c). We tested our model predictions by analyzing the intact and total DNA in a range of ecosystems with relic DNA pool sizes that could bias estimates of bacterial diversity. We found that relic DNA had minimal to no effect on commonly estimated measures of taxonomic and phylogenetic diversity, suggesting that the compositional turnover of relic and intact DNA may approach steady state conditions in a range of ecosystems despite different environmental conditions and divergent microbial assemblages (Fig. S4). In the following sections, we discuss scenarios where relic DNA should and should not lead to bias in the estimation of microbial diversity.



Relic DNA should have no effect on estimates of microbial diversity when the composition of sequences in the intact DNA pool and the relic DNA pool are at steady state. Such conditions will be met when the taxon-specific production of relic DNA (via death) equals the taxon-specific loss of relic DNA (via degradation), regardless of whether the absolute rates of these processes are fast or slow (Fig. 1). When these assumptions are met, the diversity of the relic and intact DNA pools should be identical. Therefore, sampling from the relic DNA pool should not bias estimates of diversity in the intact DNA pool, even if relic DNA makes up a large portion of the total DNA pool. Despite sampling a range of habitats with attributes that reportedly affect the turnover of relic DNA, our data suggest that measures of taxonomic and phylogenetic alpha- and beta-diversity were unbiased by relic DNA even when it accounted for > 80 % of the total DNA (Figs. S3 and S5). Similar findings are reported elsewhere. For example, there was no bias in the estimate of bacterial richness for a soil sample that contained nearly 80 % relic DNA<sup>20</sup>. Similarly, more than 90 % of the DNA recovered in lung tissues was found to be sensitive to DNase, yet the diversity of sequenced bacteria in the enzymatically treated and untreated samples was the same<sup>19</sup>.

Nevertheless, our model predicts that bias can arise when there are different species abundance distributions (SADs) for intact and relic DNA pools (Fig. 1b-c, Fig. 2S). These predictions are consistent with some reports demonstrating that relic DNA can inflate estimates of bacterial and fungal diversity<sup>20,31</sup>. While most studies have emphasized the potential to overestimate diversity, our model predicts that relic DNA pools that are low in richness or dominated by only a few taxa can also lead to the underestimation of richness, which has been observed in some samples<sup>20</sup>. Such findings suggest that the compositional turnover of intact and relic DNA pools can become decoupled. There are a number of scenarios where deviations from

steady-state conditions may arise. First, the DNA associated with certain taxa may be  
196 preferentially preserved if it is contained in soil aggregates or biofilms that physically protect  
relic DNA from enzymes or other conditions that would otherwise lead to more rapid  
198 degradation. Second, the immigration of taxa that are poorly adapted to local conditions may die  
and enrich the relic DNA pool with sequences that are dissimilar to sequences found in the local  
200 community. A similar effect could arise when dead bacteria are transported across ecosystem  
boundaries, a phenomenon that occurs, for example, when marine snow is exported from surface  
202 waters to marine sediments<sup>32</sup>. Furthermore, any abiotic or biotic perturbation that removes a  
substantial amount of living biomass could lead to divergence in the composition of sequences in  
204 the intact and relic DNA pool. For example, virulent phage can dramatically reduce the  
abundance of bacterial prey and in the process release large quantities of DNA into the  
206 environment, which could bias estimates of microbial diversity<sup>31</sup>. Last, although not fully  
explored here, shifts in rank abundance of taxa that are independent of richness or evenness  
208 could results in biased estimates of microbial diversity.

Our understanding of the microbial biosphere has been transformed by the development  
210 and application of molecular-based cultivation-independent techniques. The ability to rapidly  
obtain millions of gene sequences from a range of environments has yielded valuable insight into  
212 the processes that regulate community assembly and function<sup>25,26</sup>, and has also paved the way  
for the discovery of new metabolisms<sup>27</sup>, tests for unifying patterns of biodiversity<sup>28</sup>, and an  
214 updated tree of life<sup>29</sup>. There are limitations, however, associated with culture-independent  
techniques, which include inefficient nucleic-acid extraction methods<sup>29</sup> and "universal" primers  
216 that over-represent some taxonomic groups while overlooking others<sup>30</sup>. Sequencing of relic  
DNA is another important concern, which can potentially lead to the overestimation or

underestimation of microbial diversity. However, this bias requires the decoupling of processes that regulate the compositional turnover of the relic and intact DNA pools. While some recent evidence suggests this can arise<sup>20</sup>, our results from diverse ecosystems suggest that relic DNA contributes minimally to the characterization of microbial community structure.

## METHODS

**Relic DNA Model** — We used sampling-based simulations to model the mixing of intact and relic DNA pools. For each simulation, we sampled a regional species pool consisting of 10,000 taxa with a lognormal abundance distribution<sup>21</sup>. The intact community consisted of 1,000,000 individuals sampled from this regional pool. We then combined this intact community with a relic community at proportions from 0.01 to 0.96. In the first set of simulations, we altered the evenness of the regional pool from which the relic community was sampled. We altered the evenness by changing the scale parameter of the lognormal distribution. To decrease the evenness of the relic DNA pool, we increased the scale parameter from 0.98 to 2. To increase the evenness of the relic DNA pool, we decreased the parameter from 0.98 to 0.1. In the second set of simulations, we altered the richness of the regional pool from which the relic community was sampled. We altered richness by increasing the magnitude of the regional pool while maintaining the order of species and the scale parameter of the lognormal distribution. To increase the richness of the relic DNA pool, we increased the size of the regional pool from 10,000 to 50,000 taxa. To decrease the richness of the relic DNA pool, we decreased the size of the regional pool from 10,000 to 5,000 taxa. After mixing the intact and relic communities for both simulations, we rarified the total community to 10,000 observations and calculated richness and Bray-Curtis distances to estimate compositional differences between the intact and total DNA pools. To

estimate contribution of relic DNA to diversity, we calculate ratios (total DNA / intact DNA) for richness and Bray-Curtis distances. All simulations and estimations were performed in the R statistic environment (v 3.3.2)<sup>46</sup> using the vegan package as well as custom functions.

**Sample collection and DNA pools**— We collected samples from a range of environmental and host-associated ecosystems. First, we sampled sediments and surface water from lakes near the Michigan State University, W.K. Kellogg Biological Station (KBS) in Hickory Corners, Michigan, USA. Soils were sampled from the main sites and surrounding areas at the KBS Long-Term Ecological Research site<sup>33</sup>. We also collected fresh feces as representative gut microbiome samples from cows, dogs, horses, rabbits, and humans. In each of these ecosystem types, we obtained samples from 6 - 8 independent sites. After transporting samples to the laboratory, we added DNase to an aliquot of a sample to remove relic DNA. Our method was based on procedures that have previously been used to quantify relic DNA in marine sediments<sup>24</sup>, host tissue<sup>19</sup>, and drinking-water biofilms<sup>23</sup>. The DNase-based method has proven to be effective not only at removing extracellular DNA, but also DNA that is contained inside of dead cells<sup>23</sup>. Furthermore, it has been shown that DNase does not affect the integrity of living cells<sup>22,23</sup>. Thus, we assumed that the remaining "intact DNA" from the enzymatically treated aliquot was contained in potentially viable cells. We used another aliquot without DNase from the same sample as a control, which we refer to as "total DNA". For aqueous samples, we filtered 250 mL samples onto 47 mm 0.2 µm Supor filter (Pall Corporation) at 10 mm Hg of vacuum pressure, cut the filter in half and randomly assigned one half to a DNase treatment and used the other half as the control. For non-aquatic samples (gut, sediment, and soils), 0.25 g aliquots were transferred into two 2 mL microcentrifuge tubes. We then added 440 µL of a DNase buffer

(382.5  $\mu$ L molecular-grade H<sub>2</sub>O, 5  $\mu$ L of 1 M MgCl<sub>2</sub>, 2.5  $\mu$ L of bovine serum albumin BSA [10  
266 mg/mL], and 50  $\mu$ L of 0.5 M Tris HCl [pH = 7.5]) to the microcentrifuge tubes and randomly  
assigned one to a DNase treatment and the other to a DNase control. Prior to analyzing samples,  
268 we conducted an experiment to determine the optimal DNase concentration for effective  
hydrolysis (see Fig. S6). For samples receiving the DNase treatment, we added 40  $\mu$ L of 10  
270 U/ $\mu$ L DNase (Roche, Indianapolis, IN) and 20  $\mu$ L of ultrapure H<sub>2</sub>O to the 2 mL microcentrifuge  
containing buffer while the control received 60  $\mu$ L of ultrapure H<sub>2</sub>O. For each sample, we  
272 measured pH using a micro pH probe (Orion 9110DJWP, Thermo Scientific) and adjusted to  
7.3 - 7.7, which is in the optimum range for DNase. We then incubated the microcentrifuge tubes  
274 horizontally at 37 °C for 60 min to ensure proper mixing and enzymatic activity. To stop the  
DNase reaction, we added 25  $\mu$ L of 0.5 M EDTA to each tube and incubated at 75 °C for 10 min.  
276 The contents of the microcentrifuge tubes were then transferred to 15 mL Falcon tubes  
containing 0.1 mm glass beads. We added 1 mL cetyltrimethylammonium bromide (1X, CTAB)  
278 buffer to each Falcon tube to precipitate proteins, lipids, and polysaccharides. We then initiated  
DNA extraction by adding 1 mL of phenol:chloroform:isoamylalcohol (25:24:1) to the 15 mL  
280 Falcon tube. After vortexing for 10 min, we centrifuged the samples at 7,000 x g for 10 min. We  
transferred the top aqueous layer to a new tube, added an equal volume of  
282 chloroform:isoamylalcohol (24:1), and centrifuged at 7,000 x g for 5 min. We transferred 400  $\mu$ L  
of the top aqueous layer to a new sterile 1.5 mL tube and isolated DNA using the MO BIO  
284 PowerLyzer PowerSoil DNA Isolation Kit. The resulting purified DNA was stored at -80 °C.

286 **Contribution of relic DNA to bacterial abundance** — We used 16S rRNA gene copy numbers  
generated from quantitative PCR (qPCR) assays<sup>34</sup> to estimate the proportion of relic DNA in a  
288 sample as  $1 - (\text{intact DNA} / \text{total DNA})$ . The 30  $\mu$ L qPCR reactions contained 1  $\mu$ L of DNA

template, 0.5  $\mu$ L of each primer (10  $\mu$ mol/L), 14.5  $\mu$ L of nuclease-free H<sub>2</sub>O, and 13.5  $\mu$ L of 5

Prime 2.5x Real MasterMix SYBR ROX (5 Prime, Inc. Gaithersburg, MD, USA). We amplified

a 200 base-pair fragment of the 16S rRNA gene with Eub 338 (forward) and Eub518 (reverse)

primers<sup>35</sup>. PCR assays were performed with an Eppendorf Mastercycler Realplex<sup>2</sup> system using

previously reported thermal cycle conditions<sup>35</sup>. We generated qPCR standards from bacterial

genomic DNA (*Micrococcus* sp.) using the TOPO TA Cloning Kit (Invitrogen). We extracted

plasmids from transformed cells<sup>36</sup>, and used the M13 forward and reverse primers to generate

PCR products. The PCR products were quantified and used to generate a standard curve

capturing a range of  $10^2 - 10^7$  gene copies per  $\mu$ L. The coefficients of determination ( $r^2$ ) for our

assays ranged from 0.96 and 0.99, while amplification efficiencies fell between 93 and 99 %.

Based on melting curve analyses, we found no evidence for primer dimers or non-specific

amplification.

### **Contribution of relic DNA to bacterial diversity**

*Community sequencing* — We estimated the contribution of relic DNA to bacterial diversity

using high-throughput sequencing of the 16S rRNA gene. Specifically, we amplified the V4

region of the 16S rRNA gene from the intact and total DNA pools of each sample using

barcoded primers (515F and 806R) designed to work with the Illumina MiSeq platform<sup>37</sup>. We

cleaned the sequence libraries using the AMPure XP purification kit, quantified the resulting

products using the QuantIt PicoGreen kit (Invitrogen), and pooled libraries at equal molar ratios

(final concentration: 20 ng per library). We then sequenced the pooled libraries with the Illumina

MiSeq platform using paired end reads (Illumina Reagent Kit v2, 500 reaction kit) at the Indiana

University Center for Genomics and Bioinformatics Sequencing Facility. Paired-end raw 16S

rRNA sequence reads were assembled into contigs using the Needleman algorithm<sup>38</sup>. We

obtained a total of 12,916,632 16S rRNA sequences from 42 samples representing 21 sites. After  
 314 quality trimming with a moving average quality score (window 50 bp, minimum quality score  
 35), we aligned the sequences to the Silva Database (version 123) using the Needleman  
 316 algorithm. Chimeric sequences were removed using the UCHIME algorithm <sup>39</sup>. After this  
 filtering, there was an average ( $\pm$  SEM) of 222,701  $\pm$  9,560 sequences per site. We created  
 318 operational taxonomic units (OTUs) by first splitting the sequences based on taxonomic class  
 (using the RDP taxonomy) and then binning sequences into OTUs based on 97% sequence  
 320 similarity. Our depth of sequencing led to a high degree of coverage across samples (minimum  
 Good's Coverage = 0.98). For phylogenetic analysis, we picked representative sequences for  
 322 each OTU by using the most abundant unique sequence. We used FastTree <sup>40</sup> to generate a  
 phylogenetic tree from the representative sequences using the generalized time-reversible model  
 324 of nucleotide evolution. We calculated phylogenetic distances using weighted UniFrac distances  
<sup>41</sup>. All initial sequence processing was completed using the software package mothur (version  
 326 1.38.1) <sup>42</sup>.

*Alpha Diversity* — We estimated the effects of relic DNA on richness, evenness, and  
 328 phylogenetic diversity for the intact and total DNA pools with a sample. To estimate the number  
 330 of OTUs (i.e., richness), we used a resampling approach that subsampled each sample to an  
 equal number of sequences per sample and summed the number of OTUs that were represented  
 332 <sup>43</sup>. Briefly, we subsampled to 30,000 observations, resampled 999 additional times, and then  
 calculated the average richness estimates ( $\pm$  SEM) for each sample. To estimate the equitability  
 334 in abundance among taxa in a sample (evenness), we used the same resampling approach and  
 calculated average evenness estimates ( $\pm$  SEM) using Simpson's Evenness index <sup>44</sup>. To test  
 336 whether relic DNA affected the phylogenetic diversity within a sample, we subsampled

communities to 30,000 observations and then calculated Faith's  $D$  statistic, which sums the

branch lengths for each species found in a sample from the root to the tip of the phylogenetic tree

<sup>45</sup>. All estimations were performed in the R statistic environment (v 3.3.2) <sup>46</sup> using the vegan,

ape, ade4, picante, and plyr packages, along with custom functions.

*Beta Diversity* — We estimated the effects of relic DNA on between-sample (i.e., beta) diversity

by comparing the taxonomic and phylogenetic diversity of bacterial communities in the intact

and total DNA pools. First, we conducted a Principal Coordinates Analysis (PCoA) on  $\log_{10}$ -

transformed relative abundance data to visualize the effects of relic DNA removal (via DNase

treatment) on bacterial community composition within and among ecosystem types. The PCoA

was performed with Bray-Curtis and UniFrac distances to assess taxonomic and phylogenetic

effects, respectively. In addition, we used PERMANOVA to test for differences in taxonomic

and phylogenetic composition based on ecosystem type for the total DNA pool. Second, we

conducted a Mantel test to assess the correlation between the community resemblance matrices

(either Bray-Curtis or UniFrac) represented by the intact and total DNA pools. Last, we tested

whether relic DNA altered beta-diversity within an ecosystem type by comparing centroid

distances. To calculate this metric of sample dispersion, we determined the centroid from a

PCoA with either Bray-Curtis or UniFrac distances for the total DNA pool for all sites within a

given ecosystem type. We then measured the Euclidean distances between the centroid and all

samples (total and intact) to determine the centroid distances.

## ACKNOWLEDGMENTS

We acknowledge constructive feedback from KD Webster, RZ Moger-Reischer, EK Hall, NI

Wisnoski, and WR Shoemaker. We thank S. Kuenzel and B.K. Lehmkuhl for technical support.



This work was supported by the USDA National Institute of Food and Agriculture Grant 2011-  
 362 67019-3022 (JTL), the National Science Foundation Dimensions of Biodiversity Grant 1442246  
 (JTL), and US Army Research Office Grant W911NF-14-1-0411 (JTL). All code and data used  
 364 in this study can be found in a public GitHub repository  
 (<https://www.github.com/LennonLab/relicDNA>) and the NCBI SRA.

366

## REFERENCES

- 1 Dell'Anno, A. & Danovaro, R. Extracellular DNA plays a key role in deep-sea ecosystem  
functioning. *Science* **309**, 2179-2179 (2005).
- 2 Torti, A., Lever, M. A. & Jorgensen, B. B. Origin, dynamics, and implications of  
extracellular DNA pools in marine sediments. *Mar. Genomics* **24**, 185-196,  
doi:10.1016/j.margen.2015.08.007 (2015).
- 3 Redfield, R. J. Genes for breakfast - the have-your-cake-and-eat-it-too of bacterial  
transformation. *J. Hered.* **84**, 400-404 (1993).
- 4 Lennon, J. T. Diversity and metabolism of marine bacteria cultivated on dissolved DNA.  
*Appl. Environ. Microbiol.* **73**, 2799-2805 (2007).
- 5 Klein, D. A. Microbial communities in nature: a postgenomic perspective. *Microbe* **2**,  
591-595 (2007).
- 6 Luna, G. M., Manini, E. & Danovaro, R. Large fraction of dead and inactive bacteria in  
coastal marine sediments: Comparison of protocols for determination and ecological  
significance. *Appl. Environ. Microbiol.* **68**, 3509-3513 (2002).
- 7 Lennon, J. T. & Jones, S. E. Microbial seed banks: the ecological and evolutionary  
implications of dormancy. *Nat. Rev. Microbiol.* **9**, 119-130 (2011).
- 8 Vorkapic, D., Pressler, K. & Schild, S. Multifaceted roles of extracellular DNA in  
bacterial physiology. *Curr. Genet.* **62**, 71-79 (2016).
- 9 Levy-Booth, D. J. *et al.* Cycling of extracellular DNA in the soil environment. *Soil Biol.*  
*Biochem.* **39**, 2977-2991 (2007).

- 10 Deflaun, M. F., Paul, J. H. & Jeffrey, W. H. Distribution and molecular-weight of  
390 dissolved DNA in subtropical estuarine and oceanic environments. *Mar. Ecol. Prog. Ser.*  
**38**, 65-73 (1987).
- 392 11 Beebee, T. J. C. Identification and analysis of nucleci acids in natural freshwaters. *Sci.*  
*Total. Env.* **135**, 123-129 (1993).
- 394 12 Paul, J. H., Jeffrey, W. H., David, A. W., Deflaun, M. F. & Cazares, L. H. Turnover of  
extracellular DNA in eutrophic and oligotrophic freshwater environments of southwest  
396 Florida. *Appl. Environ. Microbiol.* **55**, 1823-1828 (1989).
- 13 Dell'Anno, A. & Corinaldesi, C. Degradation and turnover of extracellular DNA in  
398 marine sediments: Ecological and methodological considerations. *Appl. Environ.*  
*Microbiol.* **70**, 4384-4386 (2004).
- 400 14 Deflaun, M. F. & Paul, J. H. Detection of exogenous gene-sequences in dissolved DNA  
from aquatic environments. *Microb. Ecol.* **18**, 21-28 (1989).
- 402 15 Romanowski, G., Lorenz, M. G. & Wackernagel, W. Adsorption of plasmid DNA to  
mineral surfaces and protection against DNase-1. *Appl. Environ. Microbiol.* **57**, 1057-  
404 1061 (1991).
- 16 Morrissey, E. M. *et al.* Dynamics of extracellular DNA decomposition and bacterial  
406 community composition in soil. *Soil Biol. Biochem.* **86**, 42-49 (2015).
- 17 Sun J, Wang P. & Shi, Y. High fat diet decrease diversity of extracellular DNA of mice  
408 gut microbiota. *FASEB J.* **30**, ib204 (2016).
- 18 Corinaldesi, C., Barucca, M., Luna, G. M. & Dell'Anno, A. Preservation, origin and  
410 genetic imprint of extracellular DNA in permanently anoxic deep-sea sediments. *Mol.*  
*Ecol.* **20**, 642-654 (2011).

412 19 Pezzulo, A. A. *et al.* Abundant DNase I-sensitive bacterial DNA in healthy porcine lungs  
and its implications for the lung microbiome. *Appl. Environ. Microbiol.* **79**, 5936-5941  
414 (2013).

20 Carini, P. *et al.* Relic DNA is abundant in soil and obscures estimates of soil microbial  
416 diversity. *Nat. Microbiol.* **2**, 16242 (2017).

21 Shoemaker, W. R., Locey, K. J. & Lennon, J. T. A macroecological theory of microbial  
418 biodiversity. *Nat. Ecol. Evol.* **1** (2017).

22 Dell'Anno, A., Bompadre, S. & Danovaro, R. Quantification, base composition, and fate  
420 of extracellular DNA in marine sediments. *Limnol. Oceanogr.* **47**, 899-905 (2002).

23 Villarreal, J. V., Jungfer, C., Obst, U. & Schwartz, T. DNase I and proteinase K eliminate  
422 DNA from injured or dead bacteria but not from living bacteria in microbial reference  
systems and natural drinking water biofilms for subsequent molecular biology analyses.  
424 *J. Microbiol. Methods* **94**, 161-169 (2013).

24 Corinaldesi, C., Danovaro, R. & Dell'Anno, A. Simultaneous recovery of extracellular  
426 and intracellular DNA suitable for molecular studies from marine sediments. *Appl.*  
*Environ. Microbiol.* **71**, 46-50 (2005).

428 25 Lindstrom, E. S. & Langenheder, S. Local and regional factors influencing bacterial  
community assembly. *Environ. Microbiol. Rep.* **4**, 1-9 (2012).

430 26 Aanderud, Z. T., Jones, S. E., Fierer, N. & Lennon, J. T. Resuscitation of the rare  
boisphere contributes to pulses of ecosystem activity. *Front. Microbiol.* **6**, (2015).

432 27 Beja, O. *et al.* Bacterial rhodopsin: Evidence for a new type of phototrophy in the sea.  
*Science* **289**, 1902-1906 (2000).

434 28 Locey, K. J. & Lennon, J. T. Scaling laws predict global microbial diversity. *Proc. Natl. Acad. Sci. U.S.A.* **113**, 5970-5975 (2016).

436 29 Feinstein, L. M., Sul, W. J. & Blackwood, C. B. Assessment of bias associated with  
incomplete extraction of microbial DNA from soil. *Appl. Environ. Microbiol.* **75**, 5428-  
438 5433 (2009).

30 Klindworth, A. *et al.* Evaluation of general 16S ribosomal RNA gene PCR primers for  
440 classical and next-generation sequencing-based diversity studies. *Nucleic Acids Res.* **41**,  
e1 (2013).

442 31 Corinaldesi, C., Tangherlini, M., Luna, G. M. & Dell'Anno, A. Extracellular DNA can  
preserve the genetic signatures of present and past viral infection events in deep  
444 hypersaline anoxic basins. *Proc. R. Soc. Lond. Biol.* **281**, 20133299 (2014).

32 Azam, F. & Long, R. A. Oceanography - Sea snow microcosms. *Nature* **414**, 497-498,  
446 (2001).

33 Hamilton, S. K., Doll, J. E. & Robertson, G. P. *The ecology of agricultural landscapes:  
448 Long-term research on the path to sustainability.* (Oxford University Press, 2015).

34 Lau, J. A. & Lennon, J. T. Evolutionary ecology of plant-microbe interactions: soil  
450 microbial structure alters selection on plant traits. *New Phytol.* **192**, 215-224 (2011).

35 Fierer, N., Jackson, J. A., Vilgalys, R. & Jackson, R. B. Assessment of soil microbial  
452 community structure by use of taxon-specific quantitative PCR assays. *Appl. Environ. Microbiol.* **71**, 4117-4120 (2005).

454 36 Sambrook, J. & Russell, D. W. *Molecular cloning: a laboratory manual.* (Cold Spring Harbor Laboratory Press, 2001).

456 37 Caporaso, J. G. *et al.* Ultra-high-throughput microbial community analysis on the  
Illumina HiSeq and MiSeq platforms. *ISME J.* **6**, 1621-1624 (2012).

458 38 Needleman S.B. & C.D., W. A general method applicable to the search for similarities in  
the amino acid sequence of two proteins. *J. Mol. Biol.* **48**, 443-453 (1970).

460 39 Edgar, R. C., Haas, B. J., Clemente, J. C., Quince, C. & Knight, R. UCHIME improves  
sensitivity and speed of chimera detection. *Bioinformatics* **27**, 2194-2200 (2011).

462 40 Price, M. N., Dehal, P. S. & Arkin, A. P. FastTree 2-approximately maximum-likelihood  
trees for large alignments. *PLOS ONE* **5**, (2010).

464 41 Lozupone, C. A. & Knight, R. Species divergence and the measurement of microbial  
diversity. *FEMS Microbiol. Rev.* **32**, 557-578 (2008).

466 42 Schloss, P. D. *et al.* Introducing mothur: open-source, platform-independent, community-  
supported software for describing and comparing microbial communities. *Appl. Environ.*  
468 *Microbiol.* **75**, 7537-7541 (2009).

470 43 Muscarella, M. E., Jones, S. E. & Lennon, J. T. Species sorting along a subsidy gradient  
alters community stability. *Ecology* (2016).

472 44 Smith, B. & Wilson, J. B. A consumer's guide to evenness indices. *Oikos* **76**, 70-82  
(1996).

474 45 Faith, D. P. Conservation evaluation and phylogenetic diversity. *Biol. Conserv.* **61**, 1-10  
(1992).

476 46 R Core Development Team R: A language and environment for statistical computing,  
reference index version 2.8.1. R Foundation for Statistical Computing, Vienna, Austria.  
ISBN 3-900051-07-0, URL <http://R-project.org>. (2009).

478

## FIGURE CAPTIONS

**Figure 1 | A model of relic DNA dynamics.** **a** The amount of relic DNA in a microbial environment is determined by inputs associated with the mortality of viable individuals with intact DNA and by losses associated with the degradation of relic DNA. If the diversity of sequences contained in the relic DNA pool is sufficiently different from that in the intact DNA pool, then relic DNA may bias estimates of microbial biodiversity (as indicated by different colored boxes) when sampling from the total (intact + relic) DNA pool. We developed a sampling-based simulation model that created communities populated with individuals with intact DNA sampled from a lognormal species abundance distribution. We then mixed the intact community with relic individuals so that the relic contribution to total community ranged from 0.01 to 0.96. The relic community was also populated with individuals sampled from a lognormal species distribution, but which varied in **(b)** evenness (*E*) or **(c)** richness (*S*). To quantify bias in diversity, we calculated "richness ratios" which reflect the number of species in the total DNA pool (intact + relic) divided by the number of species in the intact DNA pool. When values richness ratios = 1, relic DNA has no effect on diversity; when richness ratios > 1, relic DNA leads to overestimates of diversity; richness ratios < 1, relic DNA lead to underestimation of diversity.

**Figure 2 | Proportion of bacterial relic DNA in different ecosystem types.** We quantified the amount of intact DNA in a sample after removing relic DNA with a DNase treatment. We then estimated the proportion of relic DNA as  $1 - (\text{intact DNA} / \text{total DNA})$ , where the total DNA concentration was quantified without DNase treatment. Relic DNA constituted an appreciable

portion of the total DNA pool, but was not affected by the ecosystem type from which the sample was collected (gut, soil, sediment, and water). Data are represented as means  $\pm$  95% confidence intervals.

**Figure 3 | Bias of relic DNA on within-sample bacterial diversity in different ecosystem types. a-c** We tested for the effects of bias caused by relic DNA by calculating diversity ratios for (a) richness, (b) evenness, and (c) phylogenetic diversity. The ratios reflect the diversity of the total DNA pool (intact + relic) divided by the diversity of the intact DNA pool. Relic DNA did not bias any measures of diversity in any of the ecosystem types. Data are represented as means  $\pm$  95% confidence intervals. Richness was calculated as the number of operational taxonomic units (97% sequence similarity of the 16S rRNA gene), evenness was calculated using Simpson's evenness index, and phylogenetic diversity was calculated using Faith's *D* index.



#### **Figure 4 | Bias of relic DNA on the among-sample bacterial diversity in different**

**ecosystem types. a-b** We tested for the effects of bias caused by relic DNA by calculating a beta-diversity ratio based on centroid distances. Centroid distances were estimated after performing Principle Coordinates Analyses (PCoA) using taxonomic (**a**) and phylogenetic (**b**) distance metrics (Bray-Curtis and UniFrac, respectively). The centroid distance ratio was calculated on each sample within an ecosystem type and reflects the composition of the total DNA pool (intact + relic) relative to the intact DNA pool. Relic DNA had no effect on beta-diversity for any of the ecosystem types sampled. Data are represented as means  $\pm$  95% confidence intervals.

516 Fig. 1.

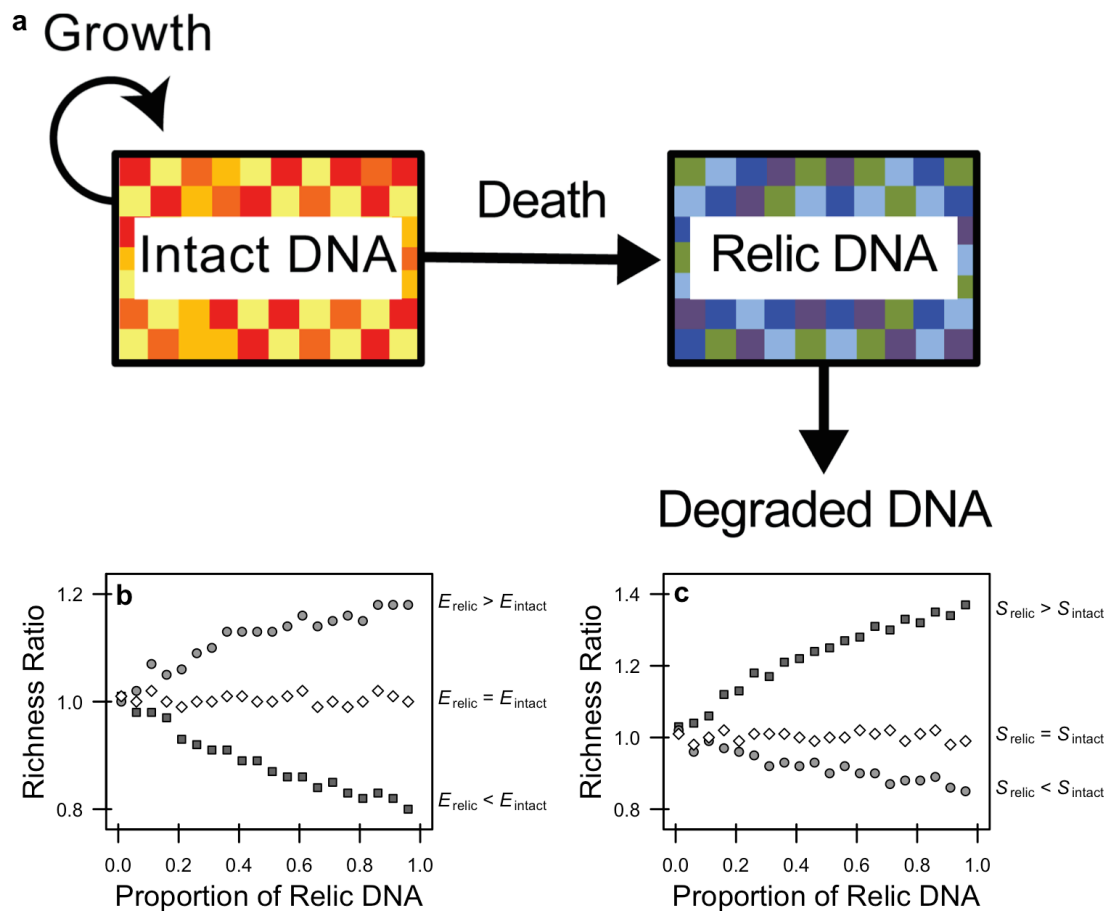

**Figure 1 | A model of relic DNA dynamics.** **a** The amount of relic DNA in a microbial environment is determined by inputs associated with the mortality of viable individuals with intact DNA and by losses associated with the degradation of relic DNA. If the diversity of sequences contained in the relic DNA pool is sufficiently different from that in the intact DNA pool, then relic DNA may bias estimates of microbial biodiversity (as indicated by different colored boxes) when sampling from the total (intact + relic) DNA pool. We developed a sampling-based simulation model that created communities populated with individuals with intact DNA sampled from a lognormal species abundance distribution. We then mixed the intact community with relic individuals so that the relic contribution to total community ranged from 0.01 to 0.96. The relic community was also populated with individuals sampled from a lognormal species distribution, but which varied in **(b)** evenness ( $E$ ) or **(c)** richness ( $S$ ). To quantify bias in diversity, we calculated "richness ratios" which reflect the number of species in the total DNA pool (intact + relic) divided by the number of species in the intact DNA pool. When values richness ratios = 1, relic DNA has no effect on diversity; when richness ratios > 1, relic DNA leads to overestimates of diversity; richness ratios < 1, relic DNA lead to underestimation of diversity.

518 Fig. 2.

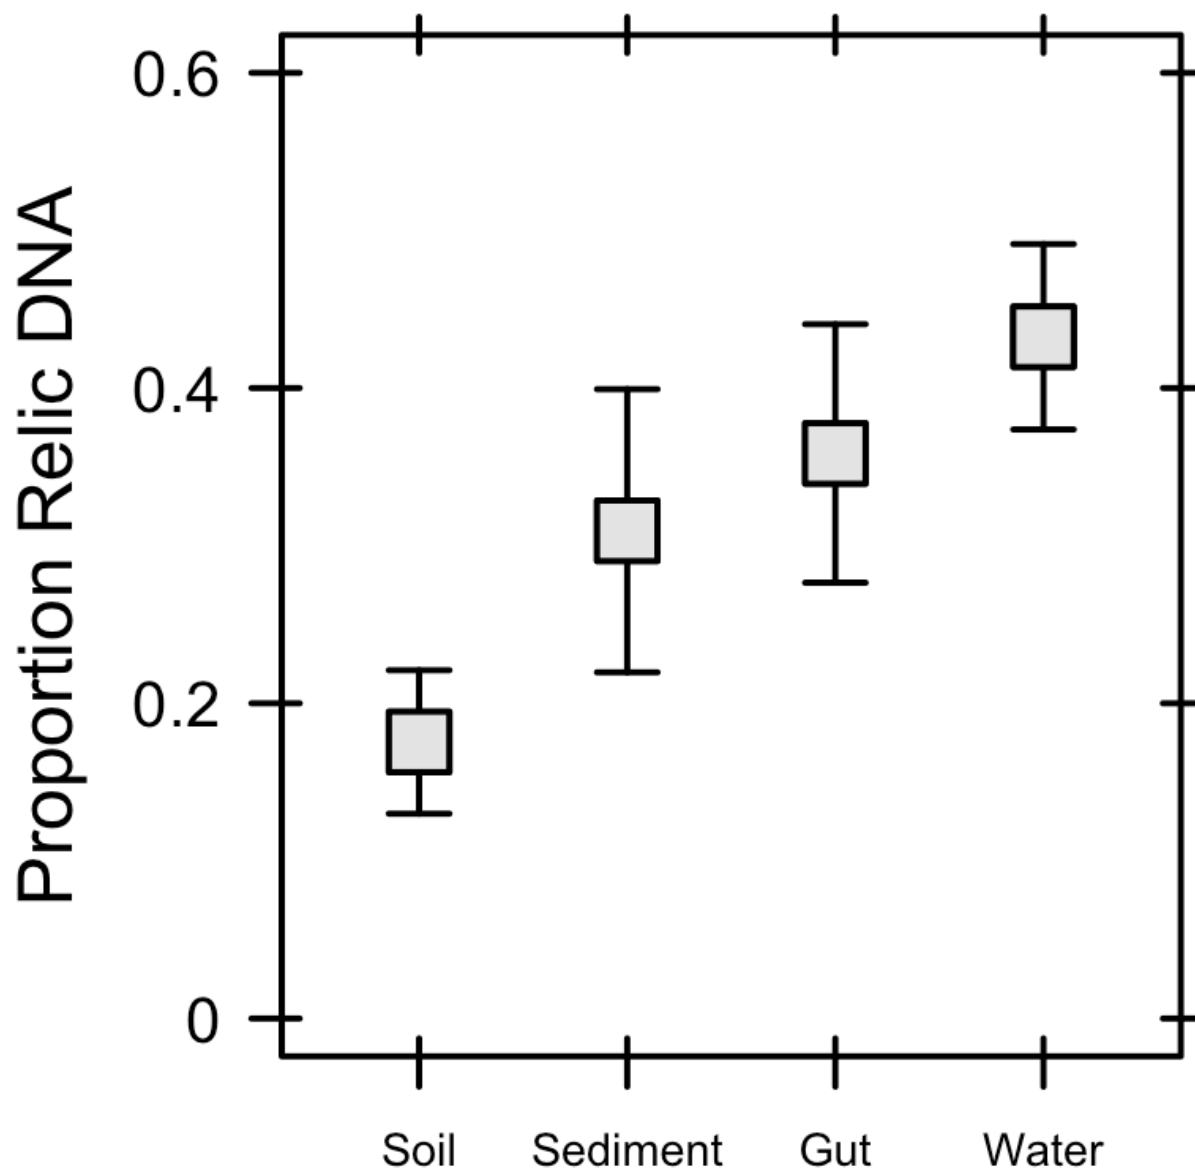

**Figure 2 | Proportion of bacterial relic DNA in different ecosystem types.** We quantified the amount of intact DNA in a sample after removing relic DNA with a DNase treatment. We then estimated the proportion of relic DNA as  $1 - (\text{intact DNA} / \text{total DNA})$ , where the total DNA concentration was quantified without DNase treatment. Relic DNA constituted an appreciable portion of the total DNA pool, but was not affected by the ecosystem type from which the sample was collected (gut, soil, sediment, and water). Data are represented as means  $\pm$  95% confidence intervals.

520 **Fig. 3.**

522

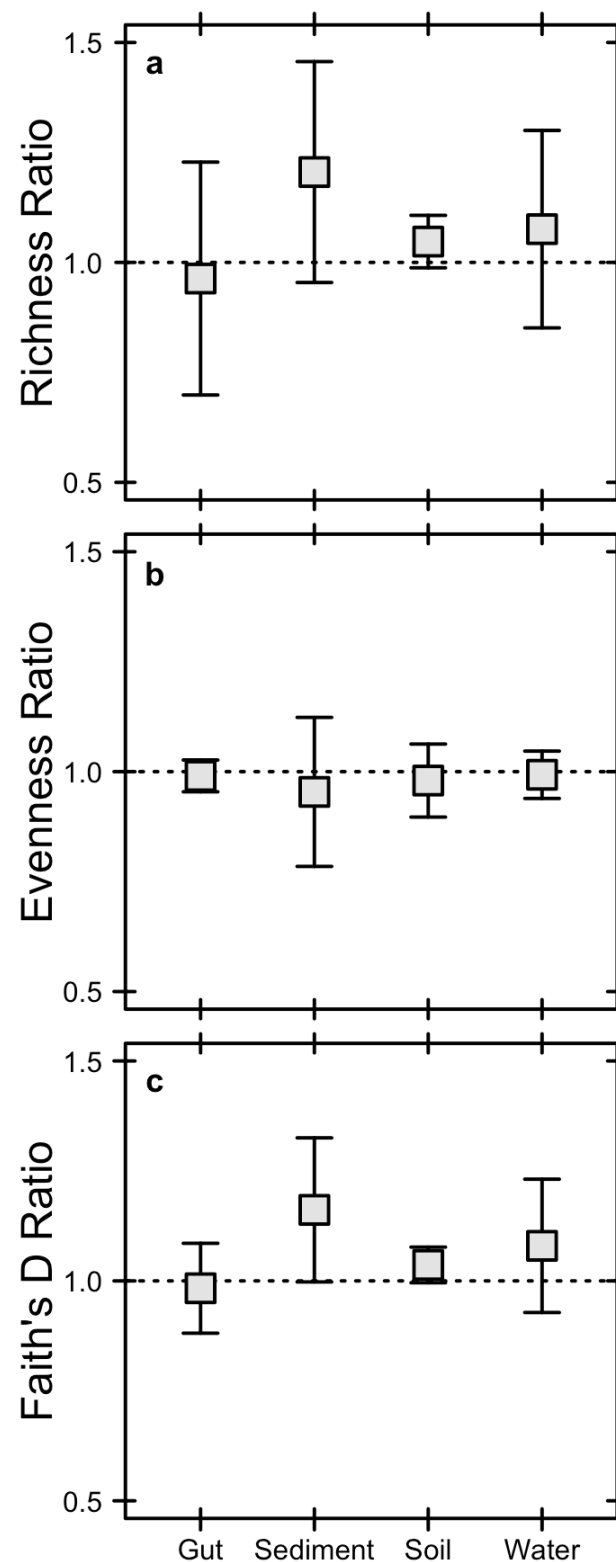

**Figure 3 | Bias of relic DNA on within-sample bacterial diversity in different ecosystem types. a-c** We tested for the effects of bias caused by relic DNA by calculating diversity ratios for (a) richness, (b) evenness, and (c) phylogenetic diversity. The ratios reflect the diversity of the total DNA pool (intact + relic) divided by the diversity of the intact DNA pool. Relic DNA did not bias any measures of diversity in any of the ecosystem types. Data are represented as means  $\pm$  95% confidence intervals. Richness was calculated as the number of operational taxonomic units (97% sequence similarity of the 16S rRNA gene), evenness was calculated using Simpson's evenness index, and phylogenetic diversity was calculated using Faith's *D* index.

524 **Fig. 4.**

526

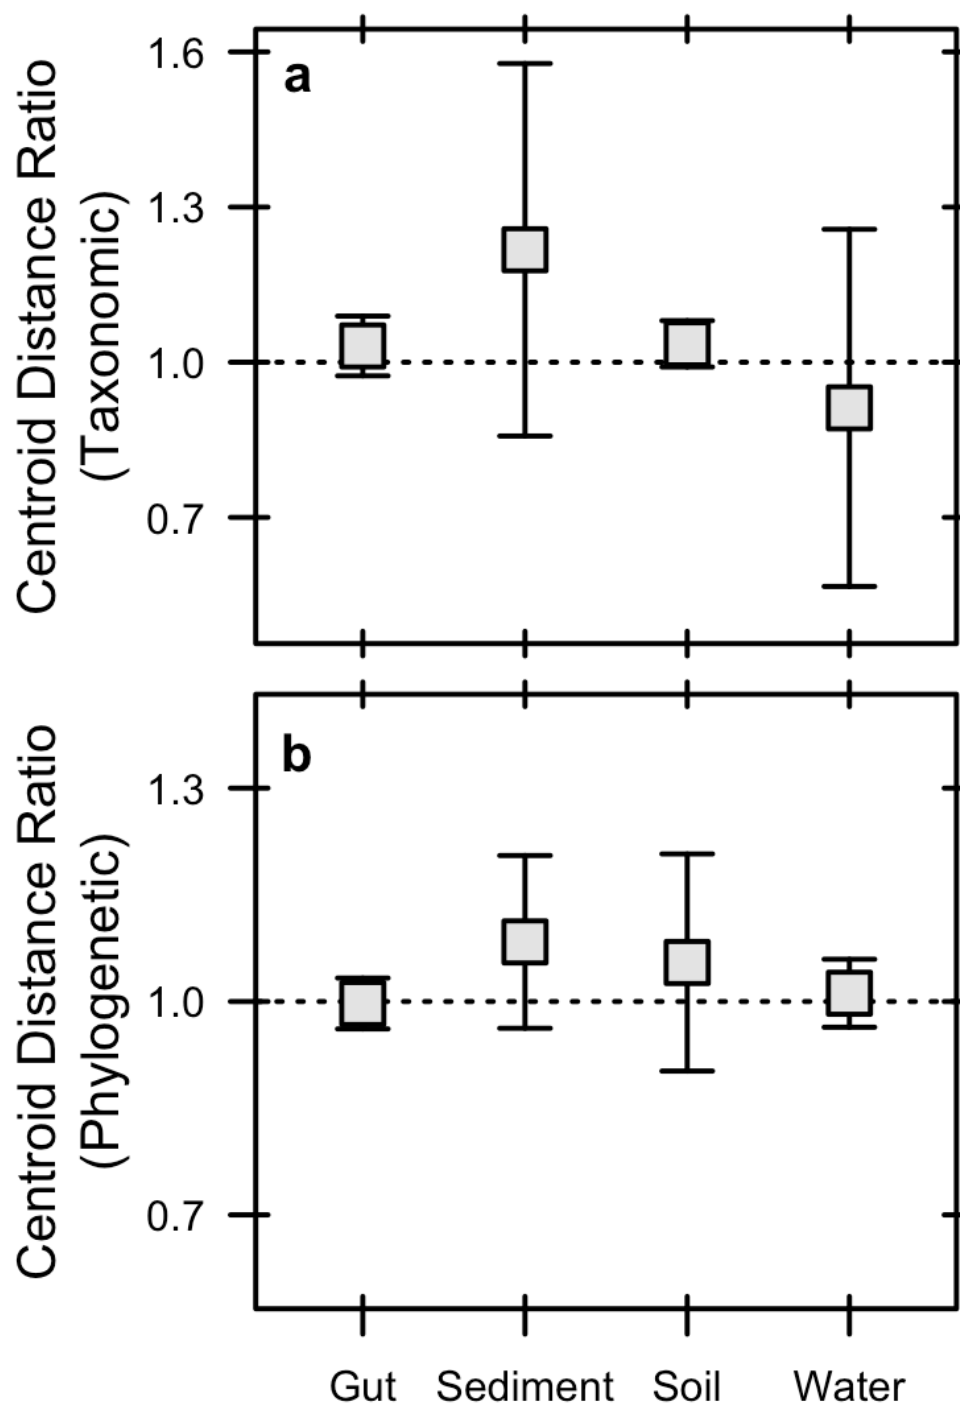

**Figure 4 | Bias of relic DNA on the among-sample bacterial diversity in different ecosystem types. a-b** We tested for the effects of bias caused by relic DNA by calculating a beta-diversity ratio based on centroid distances. Centroid distances were estimated after performing Principle Coordinates Analyses (PCoA) using taxonomic (a) and phylogenetic (b) distance metrics (Bray-Curtis and UniFrac, respectively). The centroid distance ratio was calculated on each sample within an ecosystem type and reflects the composition of the total DNA pool (intact + relic) relative to the intact DNA pool. Relic DNA had no effect on beta-diversity for any of the ecosystem types sampled. Data are represented as means  $\pm$  95% confidence intervals.
